# Supplementary material for: Fbxo22-mediated KDM4B degradation determines selective estrogen receptor modulator activity in breast cancer
Source: JCI journal article supplement (doi:10.1172/jci121679), 2018-11-11
Supplement: sd1 [file 1]

**A**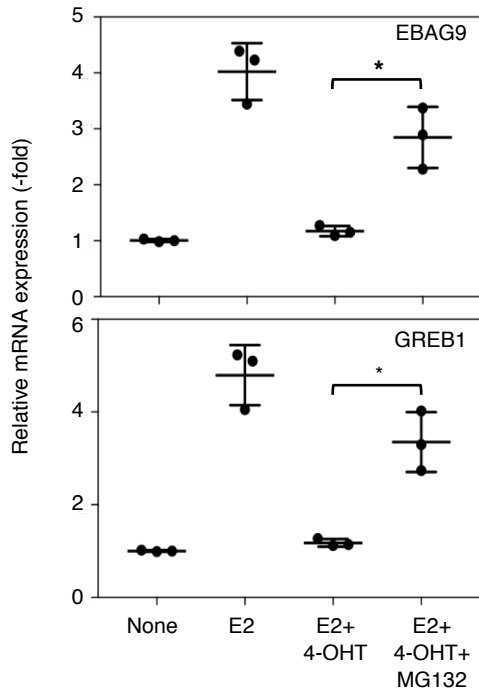**B**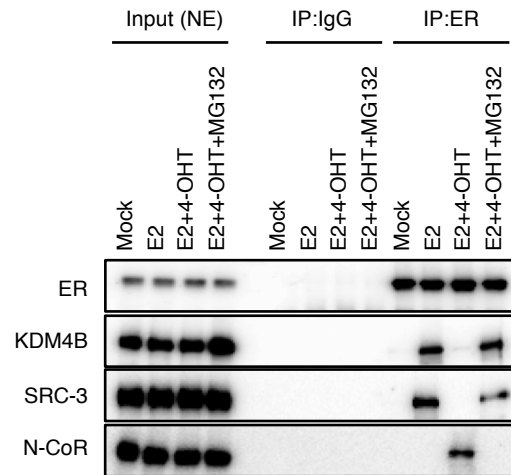

### Supplementary Figure 1. Proteasome-dependent protein degradation is required for proper shutdown of E2-signaling by 4-OHT in T47D cells

**(A)** T47D cells starved of E2 for 72 hrs were cultured with medium containing E2 (10 nM) for 6 hrs and then incubated in medium containing 4-OHT (100 nM) with or without MG132 (10  $\mu$ g/ml) for 12 hrs. Total RNA from the treated cells was subjected to qPCR analysis. The data are presented as the means  $\pm$ s.d. of three independent experiments. \* $p$ <0.01, \*\*\* $p$ <0.005 **(B)** The nuclear extracts (NE) of cells treated as in **(A)** were immunoprecipitated using the indicated antibodies and subjected to immunoblotting.

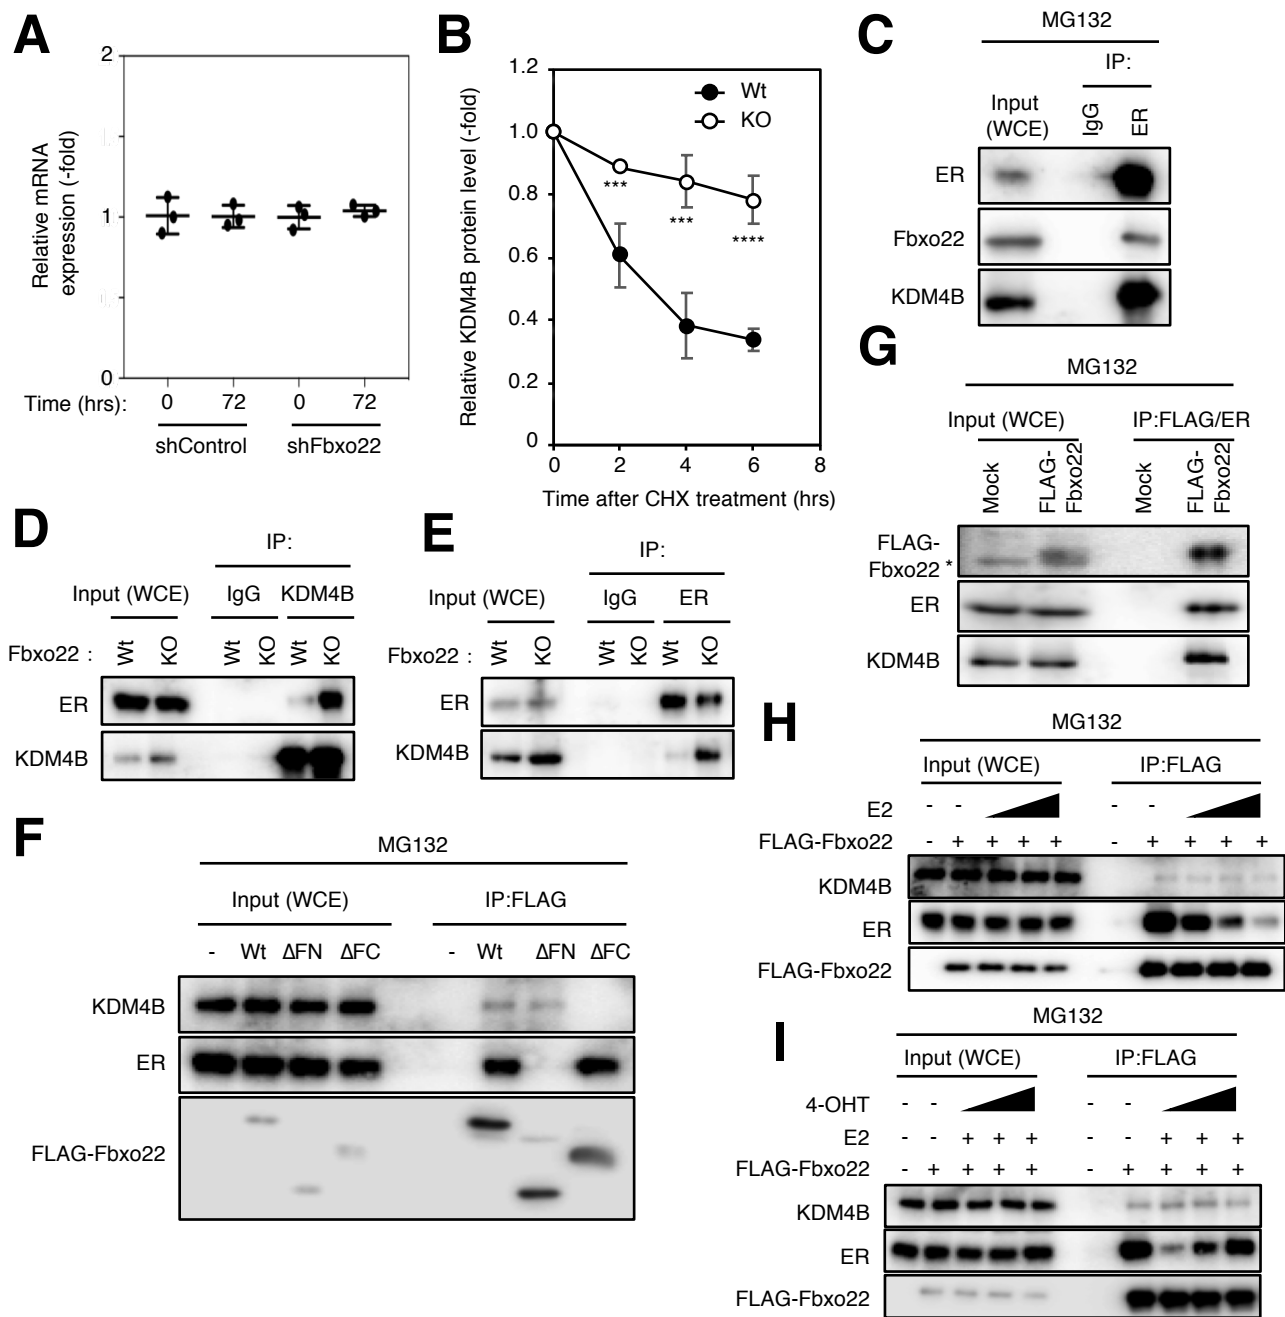

## Supplementary Figure 2. Fbxo22 forms a ternary complex with ER and KDM4B in a ligand type-dependent manner in T47D cells

**(A)** The indicated Dox-shRNAs-MCF-7 cells were treated with doxycycline (1  $\mu$ g/ml). Total RNA from the treated cells at the indicated times was subjected to qPCR analysis. The data are presented as the means  $\pm$ s.d. of three independent experiments. **(B)** Wild-type (Wt) or Fbxo22-KO (KO) T47D cells were analyzed as in Figure 2B. **(C)** T47D cells were analyzed as in Figure 2D. **(D)(E)** Wild-type (Wt) or Fbxo22-KO (KO) T47D cells were analyzed as in Figure 2E and 2F. **(F)** Dox-wild-type FLAG-Fbxo22 (Wt) or mutants lacking FIST-N ( $\Delta$ FN) or FIST-C ( $\Delta$ FC) T47D cells were analyzed as in Figure 2G. **(G)** Dox-FLAG-Fbxo22-T47D cells were analyzed as in Figure 2H. **(H)(I)** Dox-FLAG-Fbxo22-T47D cells were analyzed as in Figure 2I and 2J.

**A**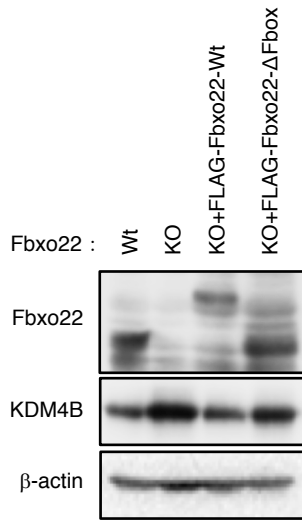**B**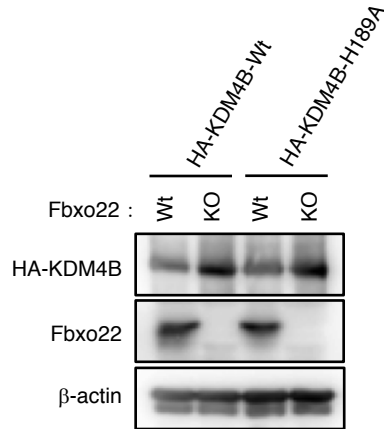

**Supplementary Figure 3. SCF<sup>Fbxo22</sup>-dependent regulation of KDM4B stability requires the F-box of Fbxo22, but not catalytic activity of KDMA4B**

**(A)** Lysates from wild-type (Wt), Fbxo22 KO (KO), and KO T47D cells expressing Fbxo22-wild type (Fbxo22-Wt) or its mutant lacking the F-box ( $\Delta$ Fbox) were subjected to immunoblotting using the indicated antibodies. **(B)** Lysates from Wt or KO T47D cells expressing wild-type HA-KDM4B (HA-KDM4B-Wt) or its catalytic mutant (HA-KDM4B-H189A) were subjected to immunoblotting using the indicated antibodies.

**A**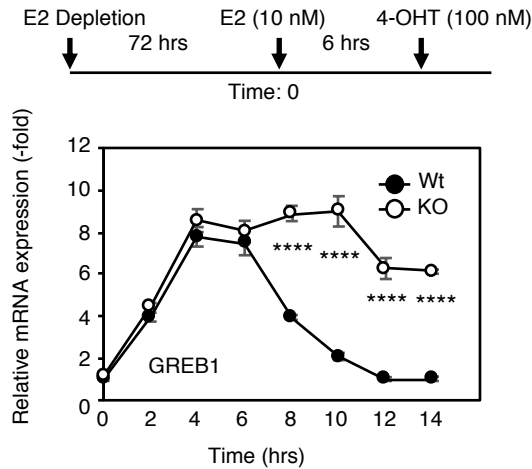**B**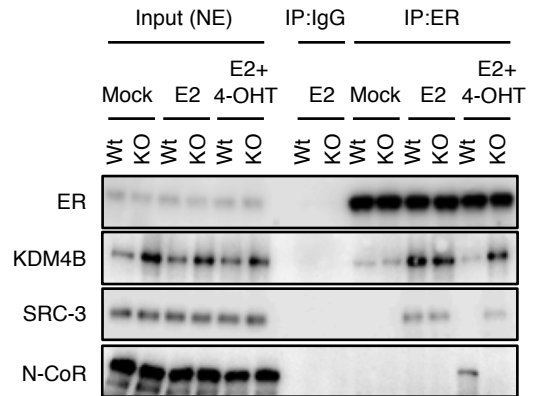

### Supplementary Figure 4. Antagonistic activity of 4-OHT requires Fbxo22 in T47D cells

**(A)** The experimental outline is shown (upper panel). Wild-type (Wt) or Fbxo22 KO (KO) T47D cells were starved of E2 for 72 hrs, treated with E2 (10 nM) for 6 hrs, and then treated with 4-OHT (100 nM). Total RNA from the treated cells at the indicated times was subjected to qPCR analysis. The data are presented as the means  $\pm$  s.d. of three independent experiments. \*\*\*\*  $p < 0.001$  **(B)** The nuclear extracts (NE) from cells treated as in (A) at 12 hrs were immunoprecipitated using the indicated antibodies and subjected to immunoblotting.



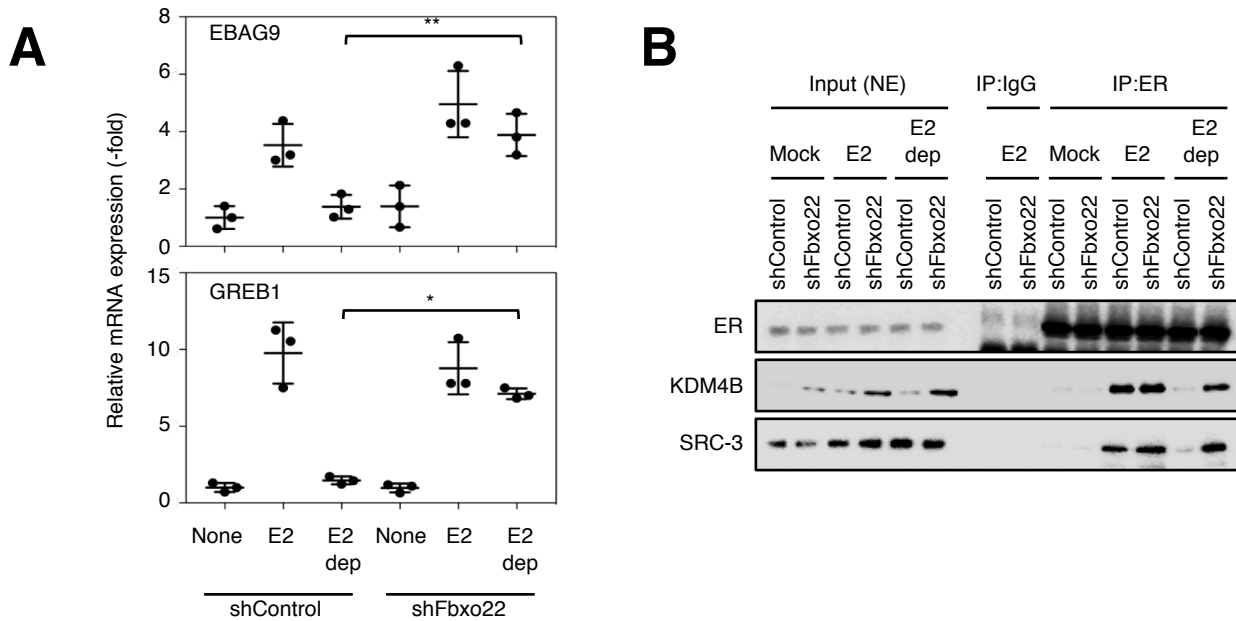

### Supplementary Figure 5. Fbxo22 is essential for suppression of ER transcription and coactivator release from ER by E2 depletion

**(A)** The indicated Dox-shRNAs-MCF-7 cells were starved of E2 in the presence of doxycycline (1  $\mu\text{g}/\text{ml}$ ) for 72 hrs, treated with E2 (10 nM) for 6 hrs, and then depleted of E2 for 24 hrs. Total RNA from the treated cells was subjected to qPCR analysis. The data are presented as the means  $\pm$ s.d. of three independent experiments. \* $p < 0.01$ , \*\* $p < 0.05$  **(B)** The nuclear extracts (NE) from cells treated as described in **(A)** were immunoprecipitated using the indicated antibodies and subjected to immunoblotting.

**A**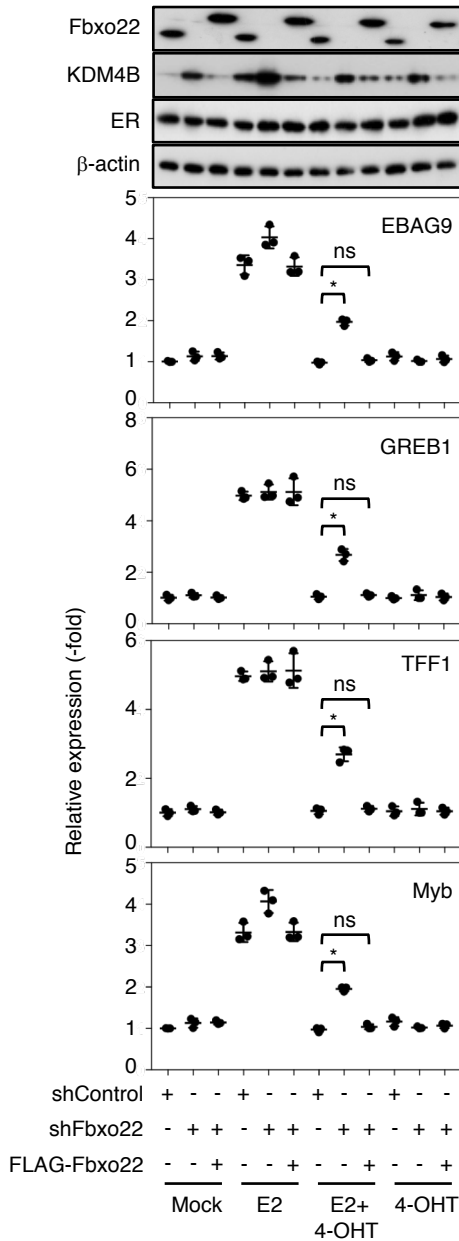**B**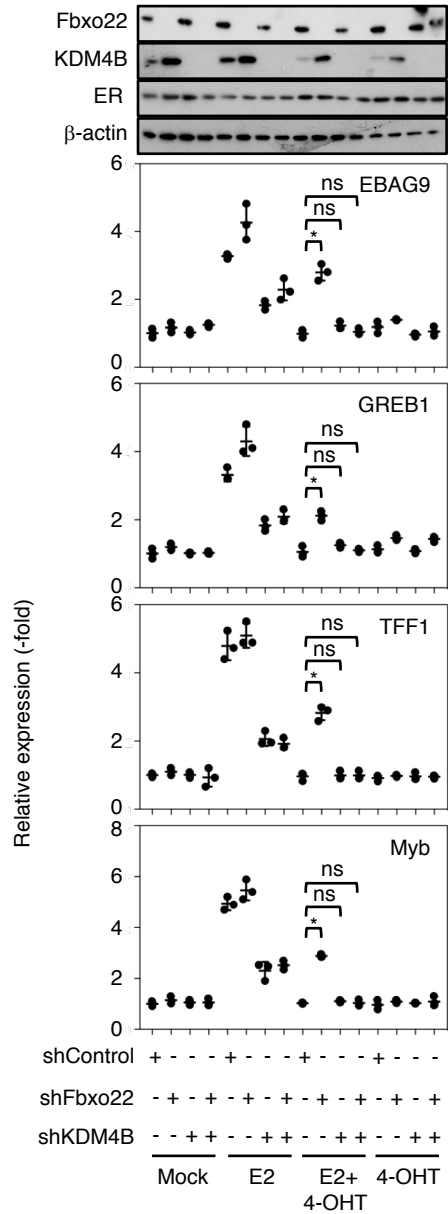

### Supplementary Figure 6. SCF<sup>Fbxo22</sup>-mediated degradation of KDM4B complexed with ER is essential for the antagonistic action of 4-OHT

**(A)** The indicated Dox-shRNAs-MCF-7 cells expressing FLAG-Fbxo22 were starved of E2 in the presence of doxycycline (1  $\mu$ g/ml) for 72 hrs, and then treated with E2 (10 nM) in the presence or absence of 4-OHT (100 nM) for 6 hrs. The lysates from the treated cells were immunoprecipitated using the indicated antibodies and subjected to immunoblotting. Total RNA from the treated cells was subjected to qPCR analysis. The data are presented as the means  $\pm$ s.d. of three independent experiments. \* $p$ <0.01, \*\* $p$ <0.05 **(B)** The indicated Dox-shRNAs-MCF-7 cells were treated and analyzed as in **(A)**. \* $p$ <0.01, \*\* $p$ <0.05, \*\*\* $p$ <0.005, ns: not significant

**A**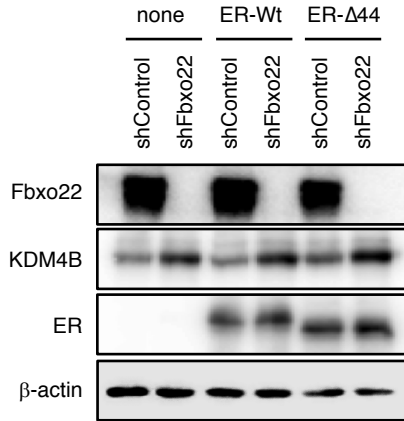**B**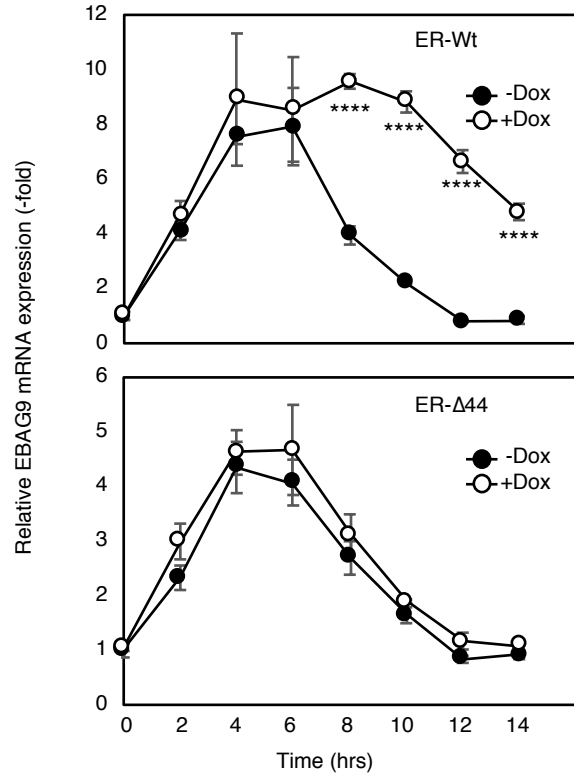

**Supplementary Figure 7. ER-induced EBAG9 transcription in Fbxo22-depleted cells in the presence of 4-OHT depends on AF1 activity**

**(A)** U2OS cells expressing wild-type ER or its  $\Delta 44$  mutant were starved of E2 in the presence of doxycycline (1  $\mu\text{g/ml}$ ) for 72 hrs. Cells were then harvested and the lysates were subjected to immunoblotting using the indicated antibodies. **(B)** U2OS cells expressing wild-type ER or its  $\Delta 44$  mutant were starved of E2 in the presence of doxycycline (1  $\mu\text{g/ml}$ ) for 72 hrs, treated with E2 (10 nM) for 6 hrs, and then treated with 4-OHT (100 nM). Total RNA from treated cells at the indicated times was subjected to qPCR analysis. The data are presented as the means  $\pm$  s.d. of three independent experiments. \*\*\*\* $p < 0.001$

**A**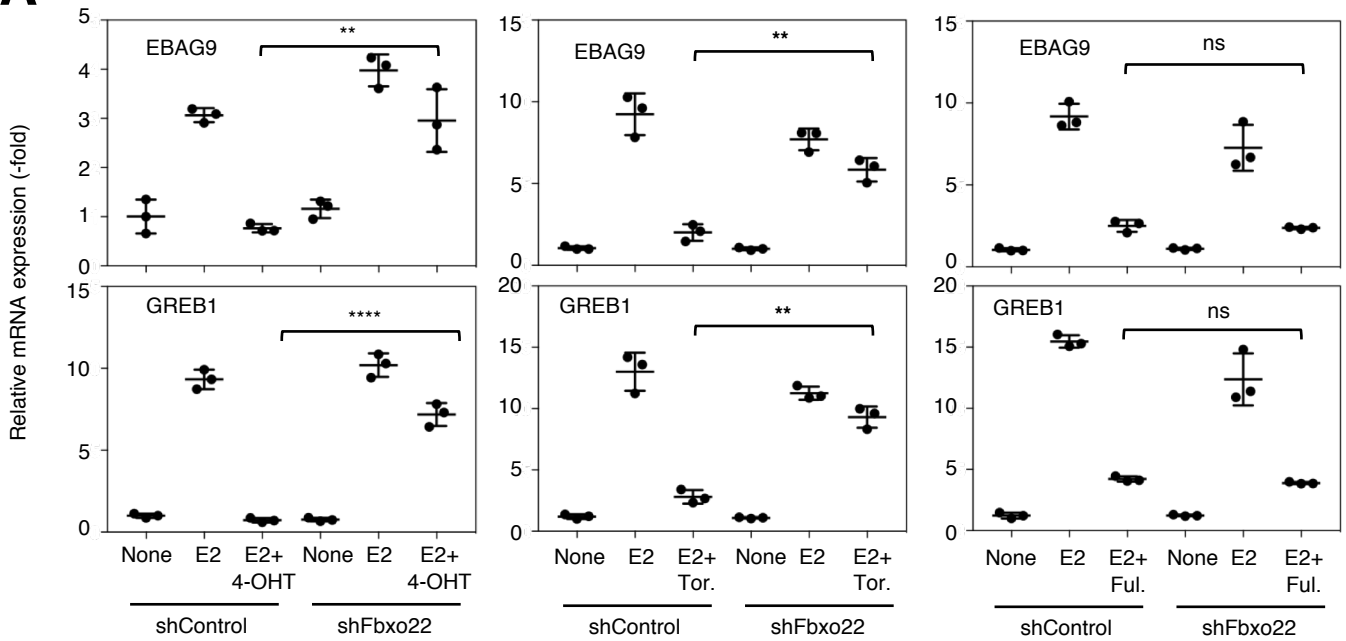**B**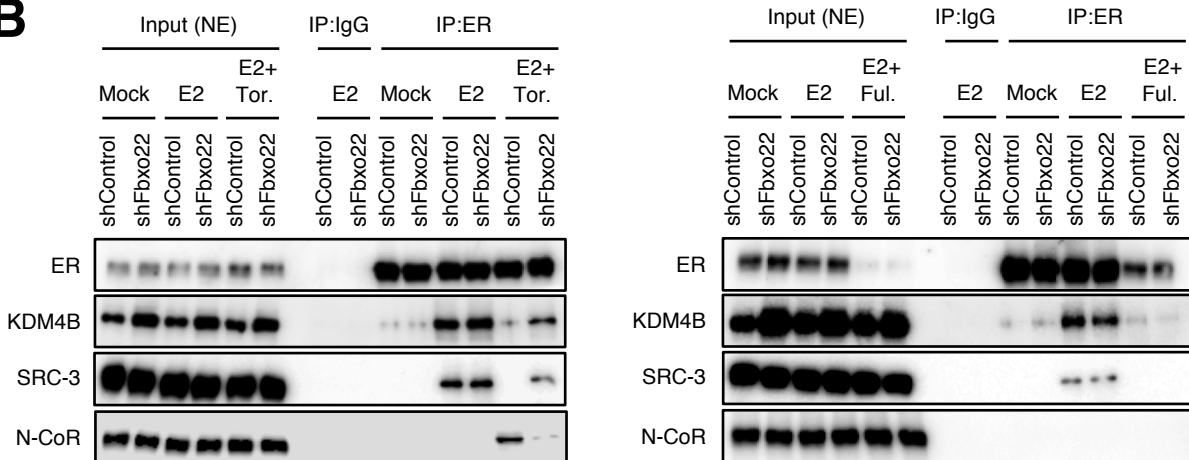

### Supplementary Figure 8. SCF<sup>Fbxo22</sup>-mediated degradation of KDM4B complexed with ER is essential for the antagonistic action of toremifene, but not fulvestrant

**(A)** The indicated Dox-shRNAs-MCF-7 cells were starved of E2 in the presence of doxycycline (1  $\mu$ g/ml) for 72 hrs, treated with E2 (10 nM) for 6 hrs, and then treated with 4-OHT (100 nM), toremifene (Tor.: 100 nM), or fulvestrant (Ful.: 100 nM) for 12 hrs. Total RNA from treated cells was subjected to qPCR analysis. The data are presented as the means  $\pm$  s.d. of three independent experiments. \*\* $p$ <0.01, \*\*\*\* $p$ <0.001, ns: not significant **(B)** The nuclear extracts (NE) from cells treated as described in **(A)** were immunoprecipitated using the indicated antibodies and subjected to immunoblotting.

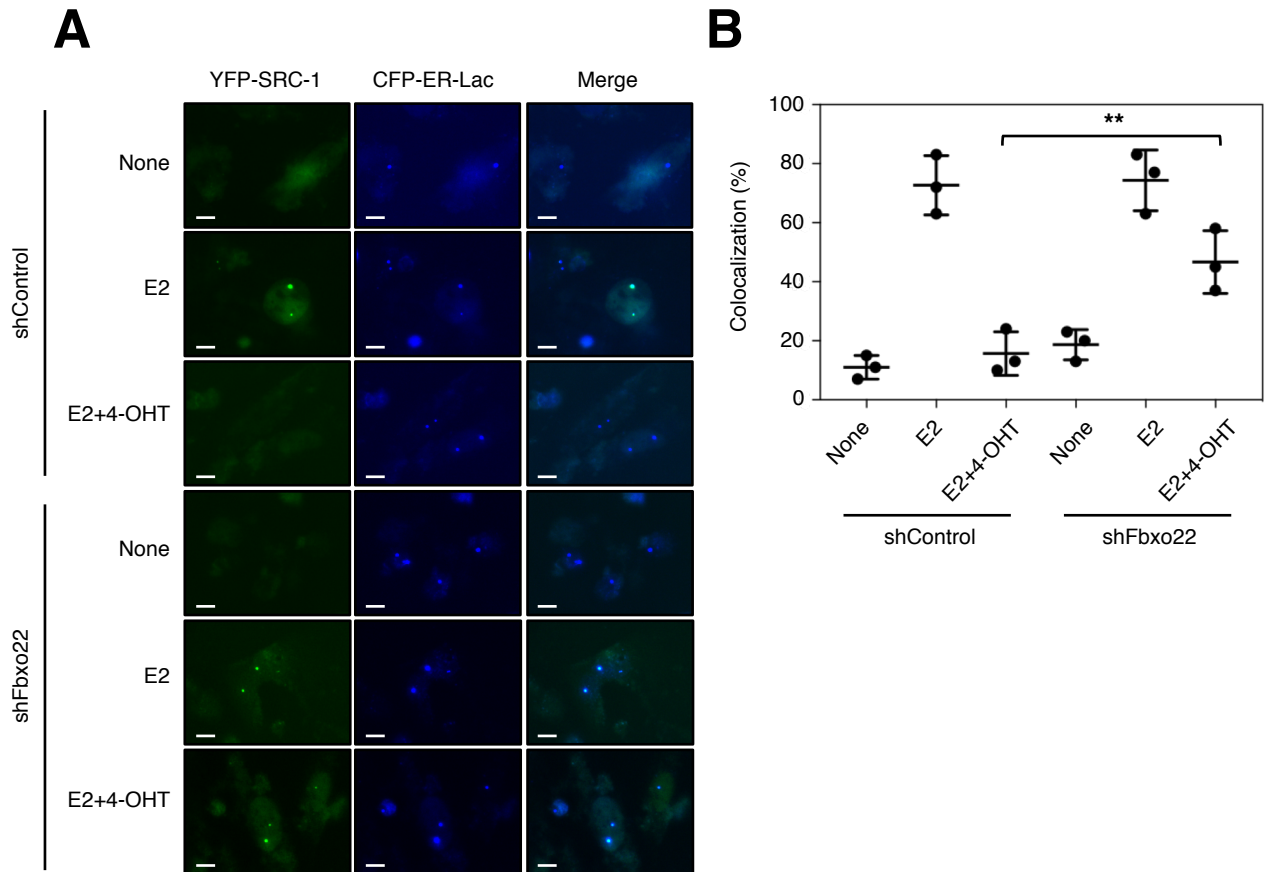

**Supplementary Figure 9. The real-time cellular dynamics of ER-SRC-1 complexes reveals the essential role of Fbxo22 in SRC-1 release from ER in the presence of 4-OHT**

**(A)** U2OS-LacO-I-SceI-TetO cells expressing the Dox-inducible shControl or shFbxo22 were transfected with YFP-SRC-1 and CFP-ERalpha-Lac plasmids, followed by treatment with doxycycline (1  $\mu$ g/ml) in E2-depleted medium for 72 hrs. These cells were then treated with or without E2 (10 nM) and/or 4-OHT (100 nM) for 2 hrs and fixed with 4% formaldehyde. Representative images of CFP-ERalpha-Lac foci and YFP-SRC-1 foci are shown. Scale bar. 10  $\mu$ m. **(B)** The number of cells positive for colocalization of CFP-ERalpha-Lac foci and YFP-SRC-1 foci as in **(A)** were counted. The data are presented as the means  $\pm$ s.d. of three independent experiments.

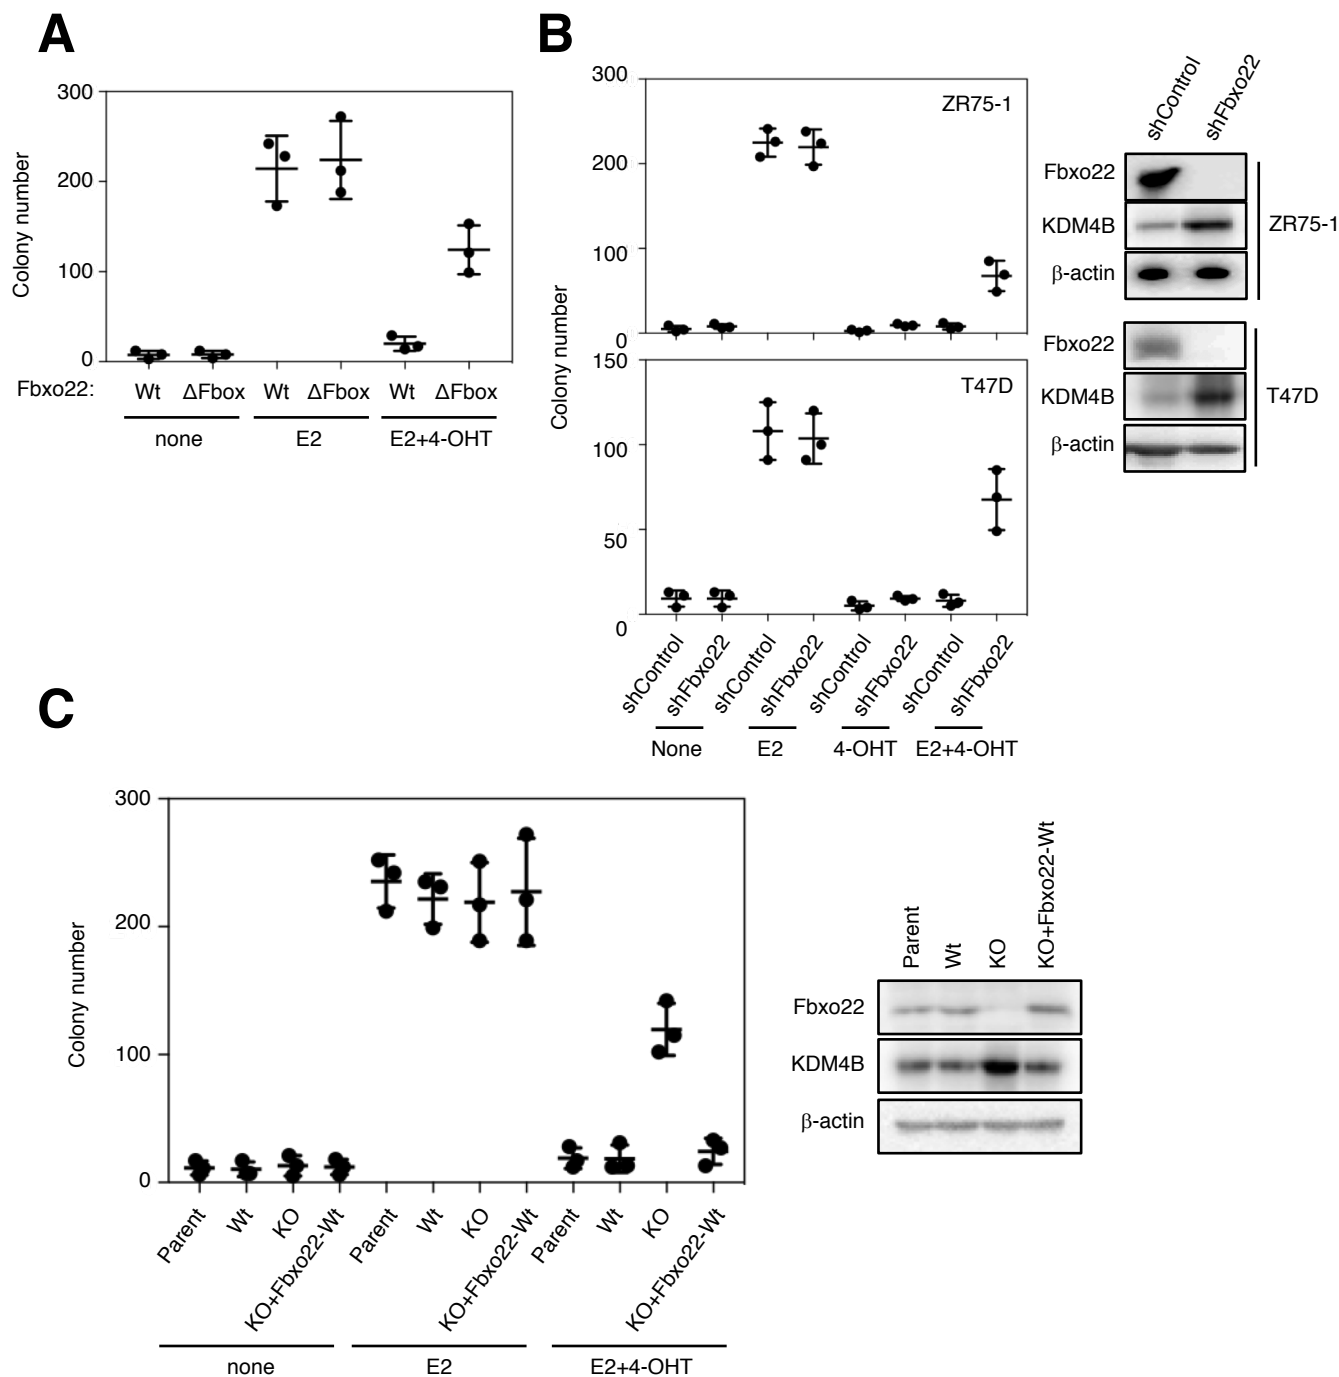

**Supplementary Figure 10. Fbxo22 is required for the antagonistic activity of TAM in ZR75-1 and T47D cells**

**(A)** KO T47D cells expressing Fbxo22-Wt or Fbxo22- $\Delta$ Fbox were starved of E2 for 72 hrs and then analyzed as in Figure 7A. Data are shown as means  $\pm$ SD of at three independent experiments. **(B)** The indicated shRNAs-ZR75-1 or -T47D cells were starved of E2 and analyzed as in **(A)** (left panels). Lysates of the cells in E2-depleted medium containing doxycycline (1  $\mu$ g/ml) for 72 hrs were subjected to immunoblotting using the indicated antibodies (right panels). **(C)** Parental, wild-type (Wt), Fbxo22-KO (KO), or KO expressing wild-type Fbxo22 (KO+Fbxo33-Wt) T47D cells were starved in E2-depleted medium for 72 hrs and then analyzed as in **(A)**.

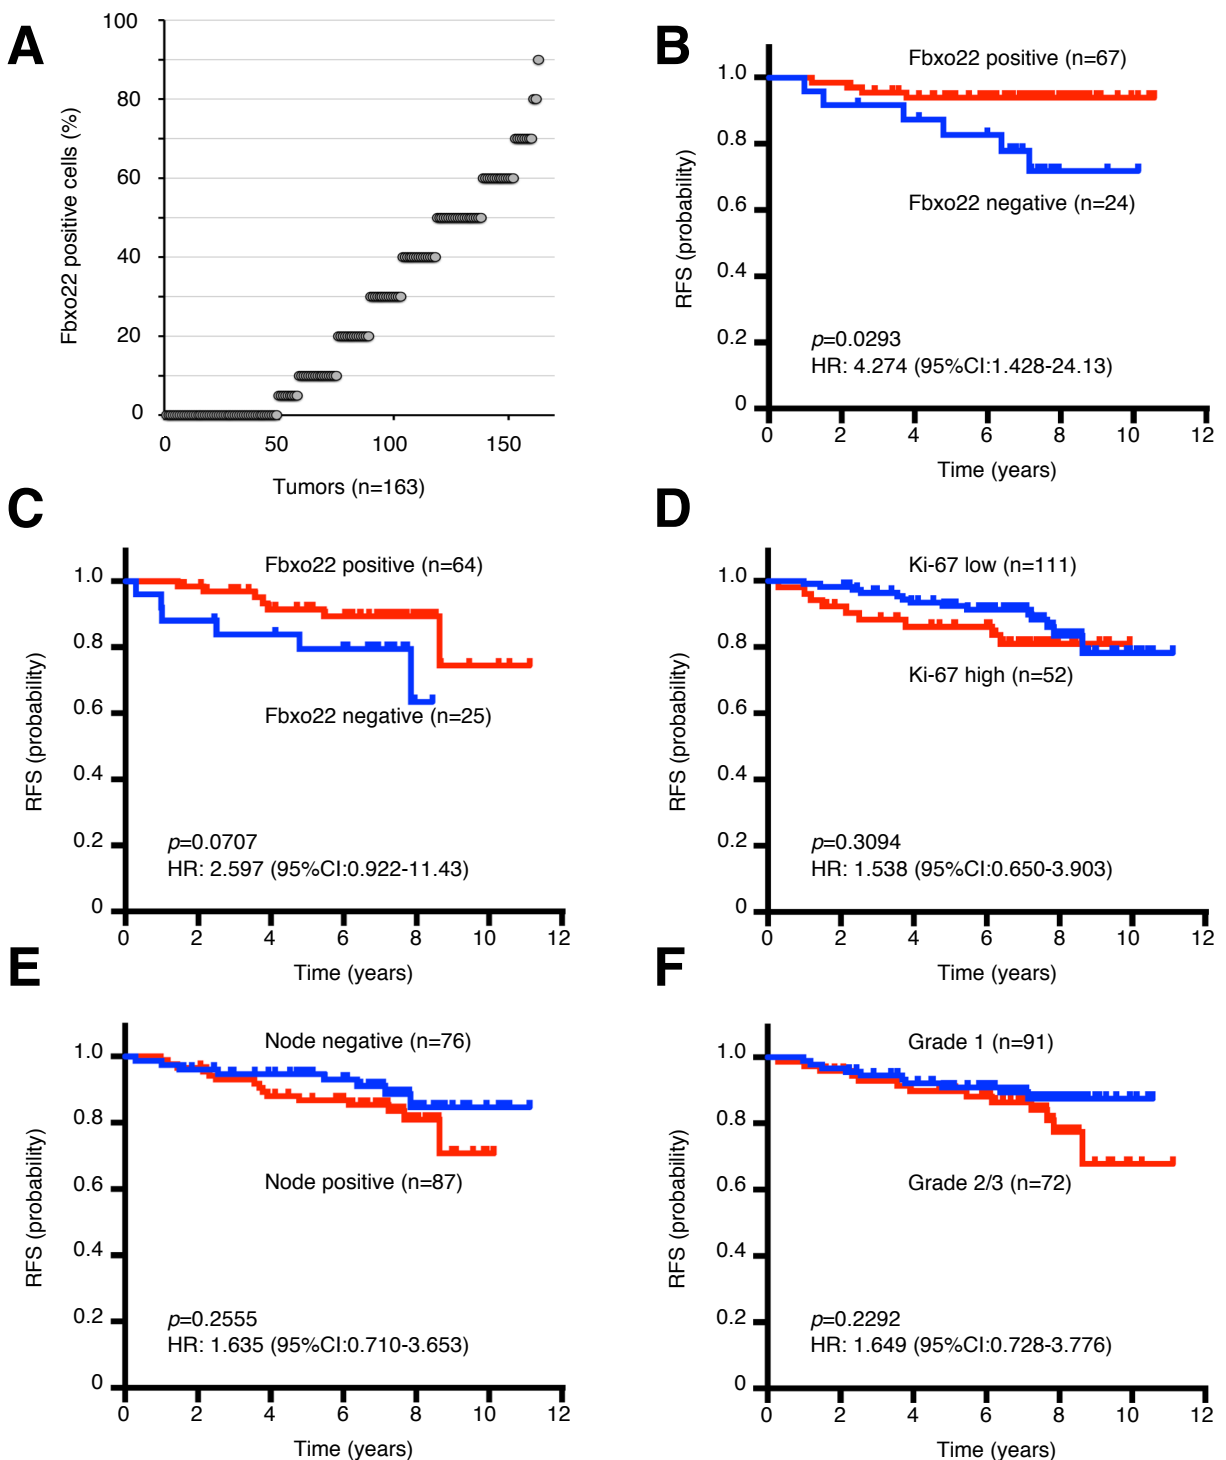

**Supplementary Figure 11. Distribution of Fbxo22 positivity and RFS stratified by Fbxo22 expression in separate cohorts or by other clinicopathological factors**

**(A)** The distribution of the percentage of Fbxo22-positive cells in 163 ER-positive/HER2-negative breast cancer cases is shown. RFS stratified by Fbxo22 protein expression in grade 1 ER-positive/HER2-negative breast cancers **(B)** and in tamoxifen-untreated breast cancers **(C)**. RFS stratified by Ki-67 status ( $\leq 10\%$  vs  $20\% \leq$ ) **(D)**, node status (positive vs negative) **(E)** or grade (1 vs 2/3) **(F)** in all T2 ER-positive/HER2-negative breast cancers. Kaplan-Meier survival curves are shown. P values and hazard ratios were calculated using a log-rank test.

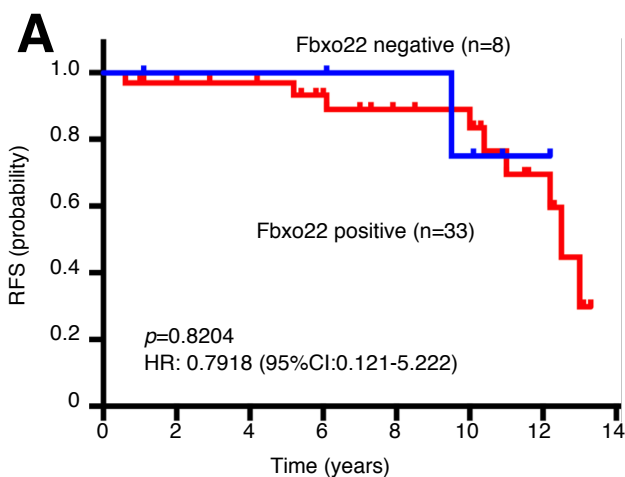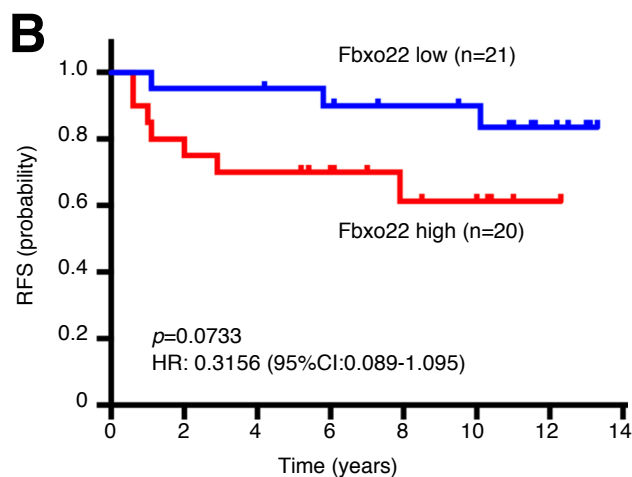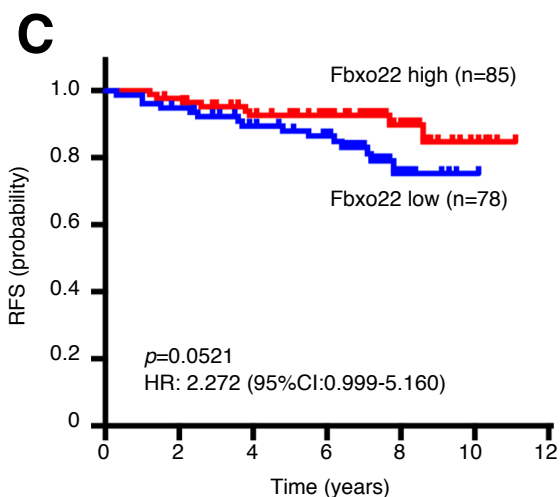

**Supplementary Figure 12. Low protein expression level of Fbxo22 does not associate with a poor outcome in patients with ER-negative breast cancers**

**(A and B)** RFS stratified by positivity (negative,  $< 1\%$  vs positive,  $1\% \leq$ ) **(A)** or the median cutoff point (low,  $< 50\%$  vs high,  $50\% \leq$ ) **(B)** of Fbxo22 protein expression in T2 ER-negative breast cancers. **(C)** RFS stratified by the median cutoff point (low,  $< 20\%$  vs high,  $20\% \leq$ ) in the main cohort of ER-positive/HER2-negative breast cancers is also shown for comparison. Kaplan-Meier survival curves are shown. P values and hazard ratios were calculated using a log-rank test. Clinicopathological variables of the ER-negative breast cancer patients are listed in Table S4.



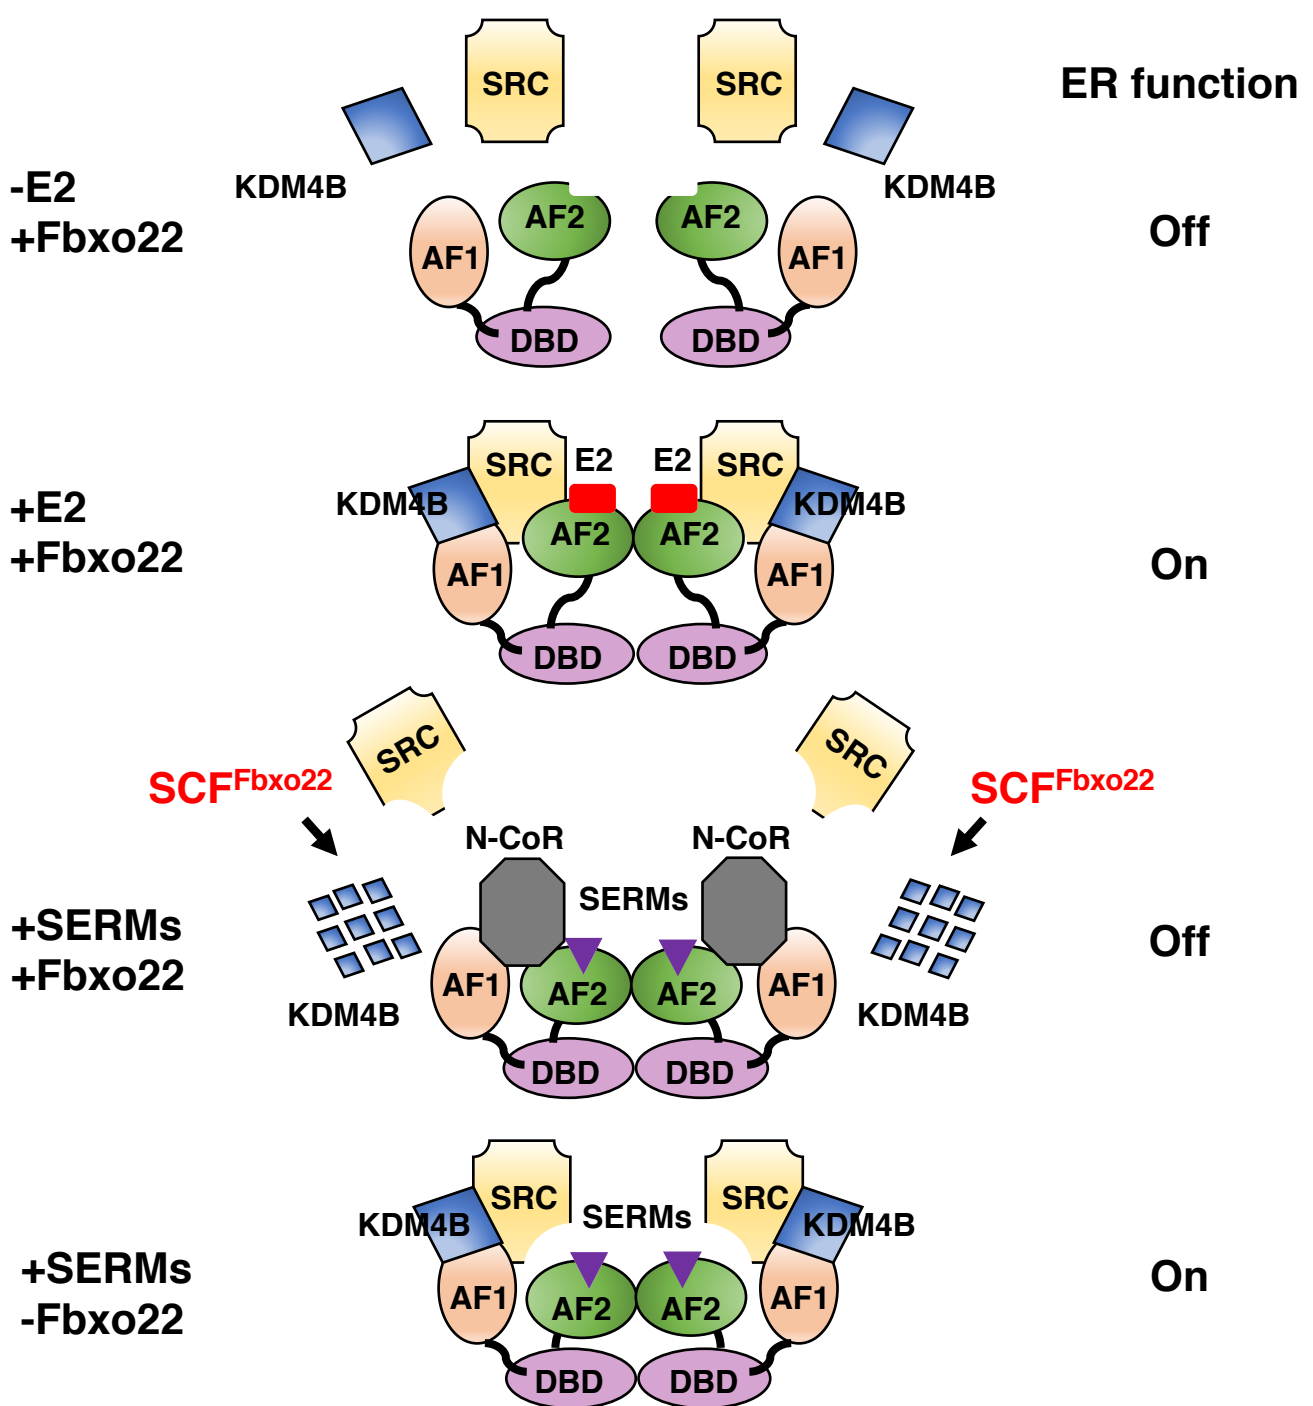

**Supplementary Figure 13. Scheme of Fbxo22 function in cofactor dynamics on ER in the presence of E2 or SERMs**

(Top panel) In the absence of E2, ER exists as a monomer and dissociates from SRCs and KDM4B. (2<sup>nd</sup> panel) In the presence of E2, E2-bound dimeric ER forms a complex with KDM4B and SRCs in Fbxo22-positive breast cancer cells. This complex formation activates ER signaling. (3<sup>rd</sup> panel) In the presence of SERMs, SCF<sup>Fbxo22</sup> specifically ubiquitylates KDM4B complexed with SERM-bound ER for degradation. KDM4B degradation in turn accelerates the dissociation of SRCs from ER and association between ER and N-CoR in Fbxo22-positive breast cancer cells. The dissociation of the complex inactivates ER signaling. (Bottom panel) In the presence of SERMs, SERM-bound ER still associates with SRCs and KDM4B through its AF1 domain in Fbxo22-negative cells. The resultant complex activates ER signaling.

**A**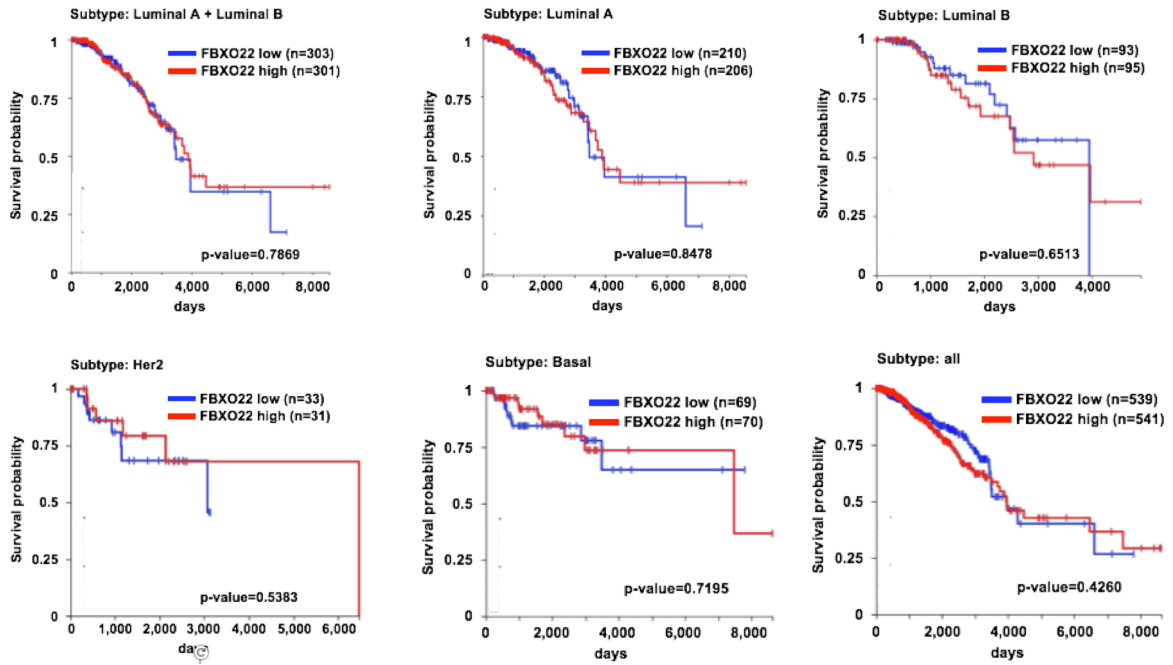**B**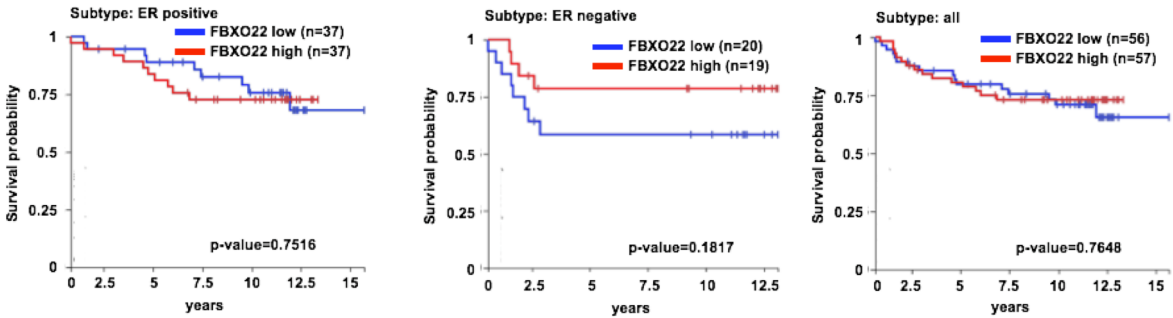**C**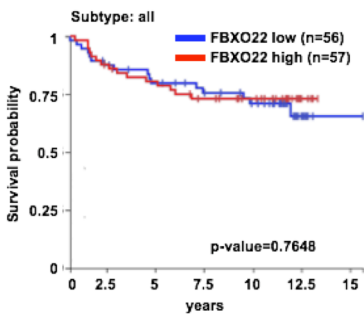**D**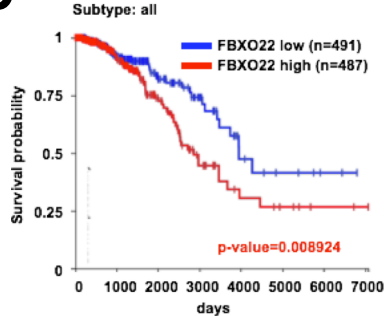

**Supplementary Figure 14. Low Fbxo22 at the gene expression level does not associate with a poor outcome in patients with breast cancers in online databases.** Overall survival stratified by the Fbxo22 gene expression level in indicated subtypes of breast cancer in TCGA (A), Breast Cancer (Caldas 2007) (B), ICGC (specimen centric)(C) and ICGC (US donor centric)(D) data bases downloaded using the UCSC Xena browser (<http://xena.ucsc.edu/>).

**A**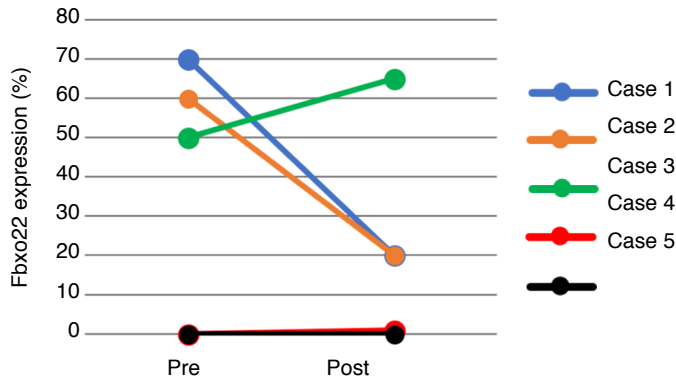**B**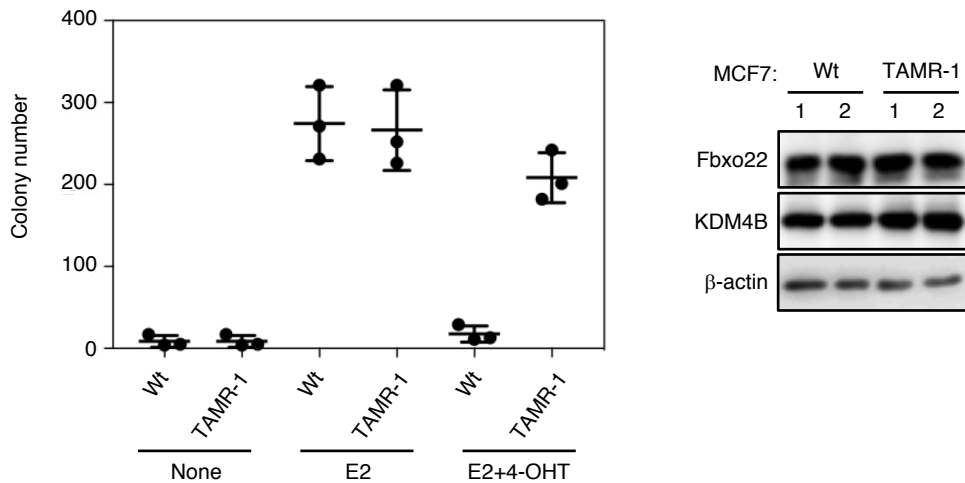

**Supplementary Figure 15. The expression levels of Fbxo22 and KDM4B did not vary in ER-positive breast cancers pre and post treatment with neoadjuvant hormone therapy, and in TAM sensitive and resistant MCF-7 cells**

**(A)** The expression levels of Fbxo22 did not vary in ER-positive/HER2-negative breast cancers pre and post treatment with neoadjuvant hormone therapy. Five patients who underwent the therapy were additionally examined for Fbxo22 expression with surgical specimens. Whereas three Fbxo22-positive cases (Cases 1, 2 and 3) remained positive after the therapy, two Fbxo22-negative cases (Cases 4 and 5) remained virtually negative (0% for Case 1 and 1% for Case 2). **(B)** TAM sensitive (Wt) and resistant (TAMR-1) MCF-7 cells established after a long term treatment with TAM (purchased from ATCC) were starved of E2, treated with E2 (10 nM) in the presence or absence of 4-OHT (100 nM) for 6 hrs, and then subjected to a quantitative colony formation assay. The results (left panel) are shown as the means  $\pm$  s.d. of three independent experiments. The lysates from each of two independent clones were subjected to immunoblotting using the indicated antibodies.

**A**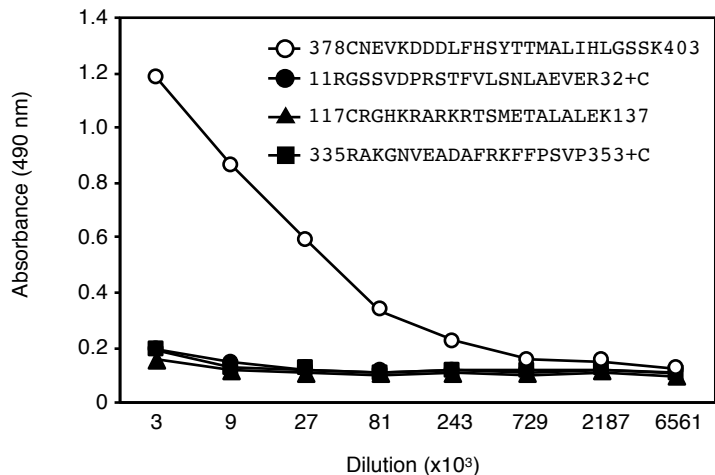**B**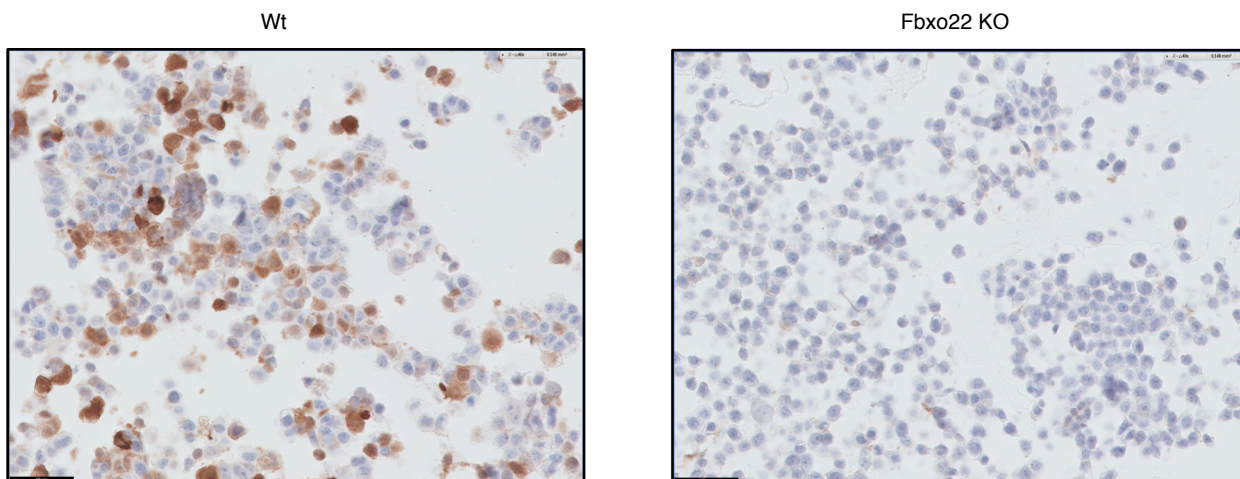**Supplementary Figure 16. Specificity of anti-Fbxo22 monoclonal antibody (FO22)**

**(A)** Specificity of antibodies to Fbxo22 was evaluated by ELISA using peptides as indicated. **(B)** Pellets prepared from Wild-type (Wt) or Fbxo22 KO (Fbxo22 KO) MCF-7 cells were formalin-fixed, paraffin-embedded, and subjected to immunohistochemical analysis using Fo-22 monoclonal antibody (in the same fashion as for the tissue immunohistochemistry).

**Supplementary Table 1. Distribution of Clinicopathological Characteristics**

| Characteristics                  | Fbxo22 expression |          | P                     |
|----------------------------------|-------------------|----------|-----------------------|
|                                  | positive          | negative |                       |
| Total samples                    | 114               | 49       |                       |
| Age, years                       |                   |          |                       |
| Mean                             | 56                | 54       |                       |
| SD                               | 13                | 13       | 0.4036 <sup>3)</sup>  |
| Node                             |                   |          |                       |
| Positive                         | 60                | 27       |                       |
| Negative                         | 54                | 22       | 0.7719 <sup>4)</sup>  |
| Grade                            |                   |          |                       |
| Low                              | 67                | 24       |                       |
| Medium / High                    | 47                | 25       | 0.2483 <sup>4)</sup>  |
| Histology <sup>1)</sup>          |                   |          |                       |
| IC of NST (invasive ductal)      | 95                | 35       |                       |
| Invasive lobular Ca              | 4                 | 7        |                       |
| Mucinous Ca                      | 8                 | 2        |                       |
| Ca with apocrine differentiation | 3                 | 0        |                       |
| Others                           | 4                 | 5        | 0.02797 <sup>5)</sup> |
| PR <sup>2)</sup>                 |                   |          |                       |
| Positive                         | 95                | 33       |                       |
| Negative                         | 19                | 16       | 0.0227 <sup>4)</sup>  |
| Ki67 <sup>2)</sup>               |                   |          |                       |
| high                             | 28                | 24       |                       |
| low                              | 86                | 25       | 0.0022 <sup>4)</sup>  |
| Chemotherapy                     |                   |          |                       |
| No                               | 52                | 17       |                       |
| Yes                              | 62                | 32       | 0.1957 <sup>4)</sup>  |
| Hormone therapy                  |                   |          |                       |
| No                               | 3                 | 2        |                       |
| tamoxifen                        | 32                | 14       |                       |
| aromatase inhibitors             | 59                | 23       |                       |
| both (TAM & AI)                  | 18                | 10       |                       |
| Others                           | 2                 | 0        | 0.8386 <sup>5)</sup>  |

1) Histology was determined based on WHO 2012 classification

IC of NST: invasive carcinoma of no special type

2) PR status: 0% vs 1% ≤, Ki-67 status: ≤ 10% vs 20% ≤

3) unpaired t-test

4) Chi-square test

5) Fisher's exact test

**Supplementary Table 2. Association between Fbxo22 positivity or clinical variables and relapse free survival**

| Variable      | Univariate |                 |        | Multivariate |                 |        |
|---------------|------------|-----------------|--------|--------------|-----------------|--------|
|               | HR         | 95% CI          | P      | HR           | 95% CI          | P      |
| <b>Fbxo22</b> |            |                 |        |              |                 |        |
| Positive      | 1.00       |                 |        | 1.00         |                 |        |
| Negative      | 2.847      | 1.248 to 6.493  | 0.0129 | 2.6483       | 1.1148 to 6.291 | 0.0274 |
| <b>Node</b>   |            |                 |        |              |                 |        |
| Negative      | 1.00       |                 |        | 1.00         |                 |        |
| Positive      | 1.639      | 0.6936 to 3.872 | 0.26   | 1.5679       | 0.6520 to 3.771 | 0.3151 |
| <b>Grade</b>  |            |                 |        |              |                 |        |
| Low           | 1.00       |                 |        | 1.00         |                 |        |
| Medium / High | 1.651      | 0.7231 to 3.768 | 0.234  | 1.4838       | 0.6396 to 3.442 | 0.3581 |
| <b>PR</b>     |            |                 |        |              |                 |        |
| Negative      | 1.00       |                 |        | 1.00         |                 |        |
| Positive      | 0.7585     | 0.2983 to 1.929 | 0.562  | 0.8473       | 0.3257 to 2.204 | 0.7341 |
| <b>Ki67</b>   |            |                 |        |              |                 |        |
| Negative      | 1.00       |                 |        | 1.00         |                 |        |
| Positive      | 1.54       | 0.6656 to 3.562 | 0.313  | 1.0409       | 0.4293 to 2.524 | 0.9293 |

\* Estimated from Cox proportional hazards model.

**Supplementary Table 3. Distribution of Clinicopathological Characteristics in the validation cohort**

| Characteristic                | Fbxo22 expression |          | <i>P</i>            |
|-------------------------------|-------------------|----------|---------------------|
|                               | positive          | negative |                     |
| Total samples                 | 13                | 17       |                     |
| <b>Age, years</b>             |                   |          |                     |
| Mean                          | 55                | 56       |                     |
| SD                            | 16                | 14       | 0.892 <sup>3)</sup> |
| <b>Node</b>                   |                   |          |                     |
| Positive                      | 4                 | 6        |                     |
| Negative                      | 9                 | 11       | 0.795 <sup>4)</sup> |
| <b>Grade</b>                  |                   |          |                     |
| Low                           | 9                 | 9        |                     |
| Medium / High                 | 2                 | 7        | 0.166 <sup>4)</sup> |
| <b>Histology<sup>1)</sup></b> |                   |          |                     |
| IC of NST (invasive ductal)   | 8                 | 16       |                     |
| Invasive lobular Ca           | 0                 | 1        |                     |
| Mucinous Ca                   | 5                 | 0        | 0.009 <sup>5)</sup> |
| <b>PR<sup>2)</sup></b>        |                   |          |                     |
| Positive                      | 11                | 13       |                     |
| Negative                      | 2                 | 4        | 0.581 <sup>4)</sup> |
| <b>Ki67<sup>2)</sup></b>      |                   |          |                     |
| high                          | 7                 | 12       |                     |
| low                           | 6                 | 5        | 0.346 <sup>4)</sup> |
| <b>Chemotherapy</b>           |                   |          |                     |
| No                            | 9                 | 9        |                     |
| Yes                           | 4                 | 8        | 0.367 <sup>4)</sup> |
| <b>Hormone therapy</b>        |                   |          |                     |
| No                            | 1                 | 3        |                     |
| tamoxifen                     | 7                 | 6        |                     |
| aromatase inhibitors          | 5                 | 8        | 0.680 <sup>5)</sup> |

1) Histology was determined based on WHO 2012 classification

IC of NST: invasive carcinoma of no special type

2) PR status: 0% vs 1% ≤, Ki67 status: ≤ 10% vs 15% ≤

3) unpaired t-test

4) Chi-square test

5) Fisher's exact test

**Supplementary Table 4. Distribution of Clinicopathological Characteristics of ER-negative breast cancer cohort**

| Characteristic                   | Fbxo22 expression |     | <i>P</i>              |
|----------------------------------|-------------------|-----|-----------------------|
|                                  | high              | low |                       |
| Total samples                    | 20                | 21  |                       |
| <b>Age, years</b>                |                   |     |                       |
| Mean                             | 58                | 55  |                       |
| SD                               | 10                | 16  | 0.445 <sup>3)</sup>   |
| <b>Node</b>                      |                   |     |                       |
| Positive                         | 9                 | 5   |                       |
| Negative                         | 11                | 16  | 0.1526 <sup>4)</sup>  |
| <b>Grade</b>                     |                   |     |                       |
| Low                              | 6                 | 2   |                       |
| Medium / High                    | 14                | 19  | 0.09818 <sup>4)</sup> |
| <b>Histology<sup>1)</sup></b>    |                   |     |                       |
| IC of NST (invasive ductal)      | 16                | 17  |                       |
| Invasive lobular Ca              | 1                 | 1   |                       |
| Ca with apocrine differentiation | 2                 | 0   |                       |
| Others                           | 1                 | 3   | 0.5684 <sup>5)</sup>  |
| <b>PR<sup>2)</sup></b>           |                   |     |                       |
| Positive                         | 0                 | 0   |                       |
| Negative                         | 20                | 21  | NA                    |
| <b>Ki67<sup>2)</sup></b>         |                   |     |                       |
| high                             | 14                | 19  |                       |
| low                              | 6                 | 2   | 0.09818 <sup>4)</sup> |
| <b>Chemotherapy</b>              |                   |     |                       |
| No                               | 1                 | 7   |                       |
| Yes                              | 19                | 14  | 0.02212 <sup>4)</sup> |

1) Histology was determined based on WHO 2012 classification

IC of NST: invasive carcinoma of no special type

2) PR status: 0% vs 1% ≤, Ki67 status: ≤ 10% vs 15% ≤

3) unpaired t-test

4) Chi-square test

5) Fisher's exact test



## Supplementary Table 5. shRNA sequences used in this study

| Target gene | Sequence              | Reference               | Type       |
|-------------|-----------------------|-------------------------|------------|
| Fbxo22      | GGAATTGTAGTGACTCCAATG | (Johmura et al., 2016)  | lentivirus |
| KDM4B       | GGAAGGACATGGTCAAGAT   | (Kawazu et al., 2011)   | lentivirus |
| Luciferase  | CGTACGCGGAATACTCGA    | (Elbashir et al., 2001) | lentivirus |

**Supplementary Table 6. Antibodies used in this study**

| <b>Antibodies</b>                 | <b>Species</b> | <b>Source</b>                              |
|-----------------------------------|----------------|--------------------------------------------|
| Anti-alpha-beta-Actin (DMIA+BMIB) | Mouse          | Neomarkers, Fremont, CA                    |
| Anti-beta-Actin (6276)            | Mouse          | Abcam, Cambridge, United Kingdom           |
| Anti-ERalpha (D8H8)               | Rabbit         | Cell Signaling Technology, Boston, MA      |
| Anti-ERalpha (HC-20)              | Rabbit         | Santa Cruz Biotechnologies, Santa Cruz, CA |
| Anti-ERalpha (H-184)              | Rabbit         | Santa Cruz Biotechnologies, Santa Cruz, CA |
| Anti-Fbxo22 (N3C3)                | Rabbit         | GeneTex, Irvine, CA                        |
| Anti-Fbxo22 (FF-7)                | Mouse          | Santa Cruz Biotechnologies, Santa Cruz, CA |
| Anti-Fbxo22                       | Mouse          | In this study                              |
| Anti-FLAG (M2)                    | Mouse          | Sigma, St. Louis, MO                       |
| Anti-HA (3F10)                    | Rat            | Roche, Basel, Switzerland                  |
| Anti-HA (12CA5)                   | Mouse          | Boehringer, Mannheim, Germany              |
| Anti-HDAC3 (7G6G5)                | Rabbit         | Cell Signaling Technology, Boston, MA      |
| Anti-KDM4A (N154/32)              | Mouse          | UC Davis/NIH NeuroMab Facility, Davis, CA  |
| Anti-KDM4B (D7E6)                 | Rabbit         | Cell Signaling Technology, Boston, MA      |
| Anti-KDM4C (27532)                | Rabbit         | Abcam, Cambridge, United Kingdom           |
| Anti-KDM4D (63199)                | Rabbit         | Abcam, Cambridge, United Kingdom           |
| Anti-NcoR (5948)                  | Rabbit         | Cell Signaling Technology, Boston, MA      |
| Anti-p300 (D2X6N)                 | Rabbit         | Cell Signaling Technology, Boston, MA      |
| Anti-SRC3 (5E11)                  | Rabbit         | Cell Signaling Technology, Boston, MA      |
| Anti-StrepII (PAB16603)           | Rabbit         | Abnova, Walnut, CA                         |
| Anti-Tubulin                      | Rabbit         | Cell Signaling Technology, Boston, MA      |

**Supplementary Table 7. Primer sequences used in this study**

| Target gene | Sequence                 | Experiment type |
|-------------|--------------------------|-----------------|
| EBAG9-Fw    | TCCCACCTTCCTTTTCGC       | qPCR            |
| EBAG9-Rv    | CCAGTCGCAGTTTCCTCAC      | qPCR            |
| GREB1-Fw    | GTGGTAGCCGAGTGGACAAT     | qPCR            |
| GREB1-Rv    | AAACCCGTCTGTGGTACAGC     | qPCR            |
| KDM4B-Fw    | GATGGCTCCTACAGCGACAA     | qPCR            |
| KDM4B-Rv    | GTCCCTACTCGTGATGCTCTC    | qPCR            |
| MYB-Fw      | GAAAGCGTCACTTGGGAAAA     | qPCR            |
| MYB-Rv      | TGTTTCGATTCGGGAGATAATTGG | qPCR            |
| TFF1-Fw     | TTGTGGTTTTCTGGTGTCA      | qPCR            |
| TFF1-Rv     | TCGAAACAGCAGCCCTTATT     | qPCR            |
